# Supplementary material
Source: HighWire-hosted journal article supplement (https://jnnp.bmj.com/content/89/7/717)
Supplement: inline-supplementary-material-2 [file inline-supplementary-material-2.pdf]

Study

Jadad Score (max 5:  
randomization 2, blinding 2,  
accountability 1)

## Parkinson`s Disease Tremor

### RF pallidum

|                   |   |
|-------------------|---|
| Vitek et al. 2003 | 4 |
| Coban et al. 2009 | 4 |

### Leukotome pallidum

|                     |   |
|---------------------|---|
| Jimenez et al. 2006 | 3 |
|---------------------|---|

### RF STN

|                     |   |
|---------------------|---|
| Merello et al. 2009 | 2 |
|---------------------|---|

## Essential Tremor

### MRIgFUS V.im.

|                   |   |
|-------------------|---|
| Elias et al. 2016 | 4 |
|-------------------|---|
